# Supplementary material
Source: PubMed Central journal article supplement (PMC4291355)

1 **SUPPLEMENTAL MATERIAL**

2

3

4 **Table S1. Goodness of fit of the Gompertz's model and magnitude of in vivo growth parameters for diverse strains of**  
5 **Enterococci under different incubation conditions.** The following modified Gompertz's equation was used:

6  $y = B + A * e^{-e^{(2.781 * (\frac{A}{S}) * (0.04 - x) + 1)}}$ ; where  $y$  is the bacterial count (in log<sub>10</sub> CFU/g) obtained at time  $x$  (in hours),  $B$  (basal) is the  
7 initial number of bacteria after induction of infection,  $A$  (from *Auctus*, the Latin word for "growth") is the difference between the  
8 maximal and minimal predicted bacterial count, and  $S$  (slope) is the growth rate. Model fitting (SigmaPlot v12.3, Systat software  
9 inc., USA) was evaluated by the adjusted coefficient of determination (adj.R<sup>2</sup>), the standard error of the estimate (S<sub>y|x</sub>), normality  
10 (Shapiro-Wilk test), homoscedasticity (constant variance test) and non-multicollinearity (defined as a variance inflation factor  
11 <10). Comparison of the magnitude of the parameters between experimental groups was done by curve fitting analysis (CFA;  
12 Prism 6.04) [23, 24]. Other abbreviation used in the table are: IIS for in vivo inoculum size (log<sub>10</sub> CFU/g) measured in non-  
13 treated mice at 0 h post-infection; NT and CV for normality and constant variance in terms of yes (passed) or no (failed); VIF:  
14 highest variance inflation factor reported; ΔG<sub>26-2</sub> is the net growth (mean) in non-treated mice; IVP for invalid parameter because  
15 NLR failed any of the presumptions normality or homoscedasticity; \*\* when it was not possible to fit Gompertz' equation to data,  
16 the closest equation was exponential decay (parameters not shown). Normal status means that non-neutropenic mice were  
17 used. All the parameters are presented with their respective standard errors (±SE).

| Strains                       | Conditions         | Status      | IIS | Adj.R <sup>2</sup> | S <sub>y x</sub> | NT  | CV  | VIF | Basal       | Slope       | Auctus      | ΔG <sub>26-2</sub> |
|-------------------------------|--------------------|-------------|-----|--------------------|------------------|-----|-----|-----|-------------|-------------|-------------|--------------------|
| <i>E. faecalis</i> ATCC 29212 | Aerobiosis         | Neutropenic | 5   | 0.55               | 0.66             | No  | No  | 6   | IVP         | IVP         | IVP         | 0.01               |
|                               | Aerobiosis+mucin   | Neutropenic | 5   | 0.95               | 0.29             | Yes | No  | 7   | IVP         | IVP         | IVP         | 2.07               |
|                               | Anaerobiosis       | Neutropenic | 7   | 0.96               | 0.14             | Yes | No  | 6   | IVP         | IVP         | IVP         | 0.84               |
|                               |                    | Neutropenic | 6   | 0.72               | 0.52             | No  | No  | 4   | IVP         | IVP         | IVP         | 0.91               |
|                               |                    | Neutropenic | 5   | 0.65               | 0.52             | No  | No  | 6   | IVP         | IVP         | IVP         | 0.46               |
|                               |                    | Normal      | 4   | **                 | **               | **  | **  | **  | **          | **          | **          | **                 |
|                               | Anaerobiosis+mucin | Neutropenic | 5   | 0.99               | 0.20             | Yes | Yes | 4   | 4.81 ± 0.06 | 0.62 ± 0.03 | 4.04 ± 0.07 | 2.64               |
|                               |                    | Neutropenic | 4   | 0.99               | 0.13             | Yes | Yes | 4   | 3.86 ± 0.09 | 0.68 ± 0.07 | 4.94 ± 0.11 | 3.64               |
|                               |                    | Normal      | 4   | 0.99               | 0.10             | Yes | Yes | 2   | 3.93 ± 0.07 | 0.74 ± 0.05 | 4.09 ± 0.09 | 2.38               |
| <i>E. faecium</i> ATCC 19434  | Aerobiosis         | Neutropenic | 6   | 0.57               | 0.35             | Yes | No  | 4   | IVP         | IVP         | IVP         | 0.19               |
|                               | Aerobiosis+mucin   | Neutropenic | 6   | 0.97               | 0.21             | Yes | Yes | 4   | 5.94 ± 0.08 | 0.27 ± 0.02 | 3.26 ± 0.11 | 2.54               |
|                               | Anaerobiosis       | Neutropenic | 6   | 0.71               | 0.52             | Yes | No  | 4   | IVP         | IVP         | IVP         | 0.66               |
|                               | Anaerobiosis+mucin | Neutropenic | 6   | 0.98               | 0.18             | Yes | Yes | 3   | 6.17 ± 0.06 | 0.30 ± 0.02 | 3.12 ± 0.09 | 2.40               |
|                               |                    | Neutropenic | 7   | 0.94               | 0.23             | Yes | Yes | 5   | 7.00 ± 0.06 | 0.37 ± 0.10 | 2.25 ± 0.19 | 1.62               |
| <i>E. faecalis</i> ATCC 51299 | Anaerobiosis+mucin | Neutropenic | 5   | 0.94               | 0.31             | Yes | Yes | 4   | 4.73 ± 0.16 | 0.73 ± 0.07 | 3.04 ± 0.19 | 1.65               |
| <i>E. faecium</i> ATCC 51559  | Anaerobiosis+mucin | Neutropenic | 5   | 0.99               | 0.10             | Yes | Yes | 4   | 5.66 ± 0.06 | 0.66 ± 0.04 | 3.09 ± 0.07 | 1.72               |

**Figure S1. Dissemination of *E. faecium* ATCC 19434 to bloodstream and spleen in neutropenic animals 26 hours after thigh infection with inocula prepared using anaerobiosis+mucin (black bar, N=7 mice), aerobiosis+mucin (light gray bar, N=8) or aerobiosis (dark gray bar, N=7).** Data are representative of two independent experiments. The P value of each post-hoc comparison (Dunn for Kruskal-Wallis and Holm-Sidak after ANOVA) is represented above the bars by asterisks (\*=  $P \leq 0.05$ , \*\*=  $P \leq 0.01$  and \*\*\*=  $P \leq 0.001$ ) or by NS ( $P > 0.05$ ). In spleen, the anaerobiosis+mucin group had higher dissemination than aerobiosis ( $\Delta +1.8 \log_{10}$  CFU/g,  $P < 0.001$ ) and aerobiosis+mucin ( $\Delta +0.9 \log_{10}$  CFU/g,  $P = 0.022$ ). In blood, the anaerobiosis+mucin group again was associated with greater dissemination than aerobiosis ( $\Delta +1.6 \log_{10}$  CFU/g,  $P \leq 0.01$ ) and aerobiosis+mucin ( $\Delta +1.1 \log_{10}$  CFU/g,  $P \leq 0.01$ ). Bacteremia was demonstrated in 14% (1 of 7), 63% (5 of 8), and 100% (7 of 7) of the mice allocated to aerobiosis, aerobiosis+mucin and anaerobiosis+mucin, respectively.

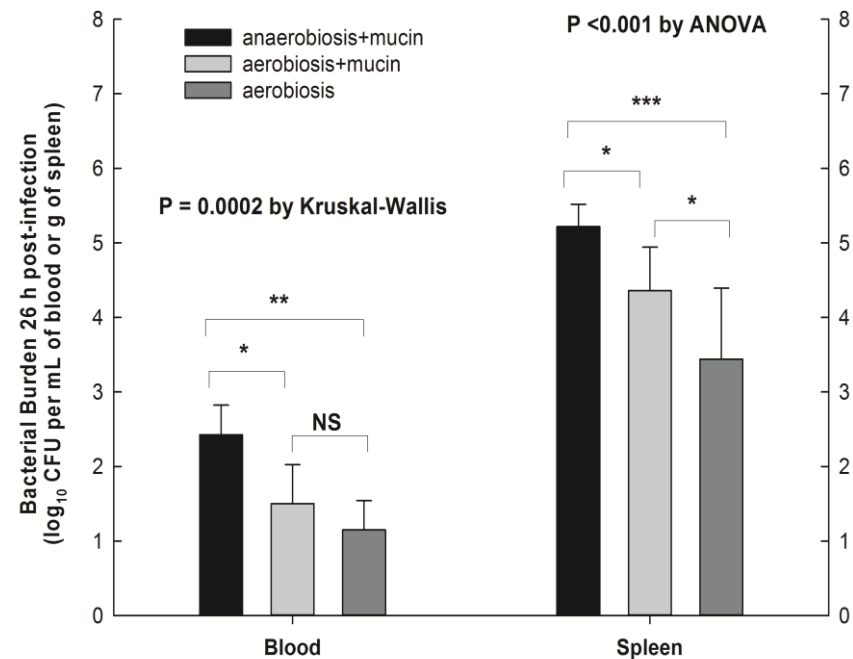

Supplement: AAC.02352-13_zac001153570so1.pdf [file AAC.02352-13_zac001153570so1.pdf]
